# Supplementary material for: Atomic Defect Induced Saturable Absorption of Hexagonal Boron Nitride in Near Infrared Band for Ultrafast Lasing Applications
Source: MDPI journal article supplement (doi:10.3390/nano11123203), 2021-11-26
Supplement: s1 [file s1]

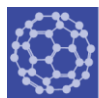

## Article

# Atomic Defect Induced Saturable Absorption of Hexagonal Boron Nitride in Near Infrared Band for Ultrafast Lasing Applications

Chen Cheng <sup>1,\*</sup>, Ziqi Li <sup>2</sup>, Ningning Dong <sup>3</sup>, Rang Li <sup>2</sup>, Jun Wang <sup>3</sup> and Feng Chen <sup>2,\*</sup>

<sup>1</sup> Shandong Provincial Key Laboratory of Optics and Photonic Devices, School of Physics and Electronics, Shandong Normal University, Jinan 250014, China

<sup>2</sup> State Key Laboratory of Crystal Materials, School of Physics, Shandong University, Jinan 250100, China; drzqili@163.com (Z.L.); sdurangli@163.com (R.L.)

<sup>3</sup> Key Laboratory of Materials for High-Power Laser, Shanghai Institute of Optics and Fine Mechanics, Chinese Academy of Sciences, Shanghai 201800, China; n.n.dong@siom.ac.cn (N.D.); jwang@siom.ac.cn (J.W.)

\* Correspondence: drccheng@sdsu.edu.cn (C.C.); drfchen@sdu.edu.cn (F.C.)

## Calculations of Defective Absorption

Figure S1 shows the optimized structure for the boron-vacancy (Bv) defect in hexagonal boron nitride (h-BN), in which the bond lengths have been labelled.

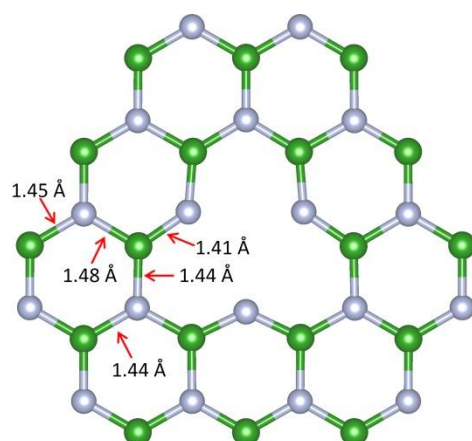

**Figure S1.** Chemical bond lengths (in Angstroms) in the Bv-defective hBN. The boron and nitrogen atoms are represented by green and grey balls respectively.

For investigating the defects in h-BN, we may consider the most likely candidates of defective structures, not only the Bv defect. Figure S2 a–c show other three defective structures including nitrogen-vacancy (Nv), an anti-site complex in which the boron atom substitutes the nitrogen atom and there is a missing atom at the boron site (NvB<sub>N</sub>), and corresponding BvN<sub>B</sub> (the nitrogen atom substitutes the boron atom).

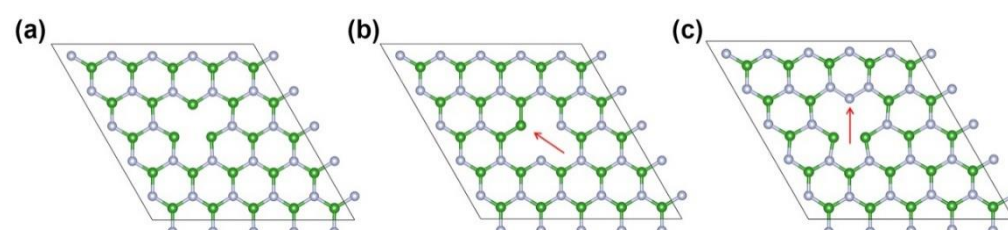

**Figure S2.** The geometry structure of BN with (a) one N-atom vacancy, (b) B-atom vacancy and B<sub>N</sub> substitution, (c) N-atom vacancy and N<sub>B</sub> substitution. Red arrows mark the substitution sites.

All possible defects have been calculated by Vienna ab initio simulation package (VASP) as same conditions in the main text. According to projector-augmented wave (PAW) method, the transmissions finally can be calculated. Figure S3 a,b show the transmission spectra under the conditions of spin-polarized solutions.

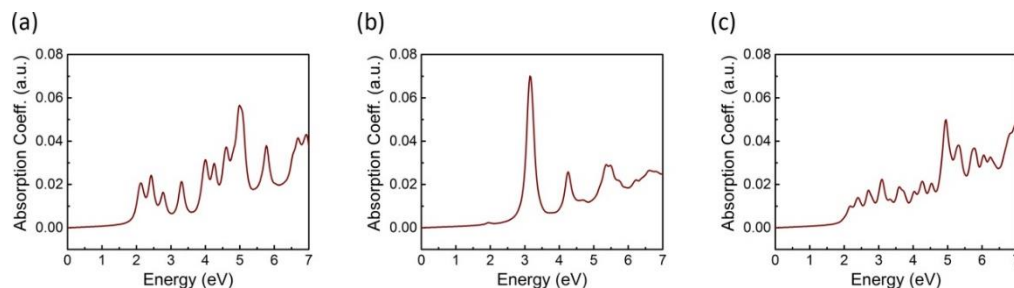

**Figure S3.** The calculated absorption coefficients of (a) Nv-defective, (b) NvB<sub>N</sub>-defective and (c) BvN<sub>B</sub>-defective h-BN.

### Non-Linear Transmission Responses

Figure S4 a–d show non-linear transmission responses detected by the Z-scan system with 50  $\mu\text{J}$ , 80  $\mu\text{J}$ , 100  $\mu\text{J}$  and 150  $\mu\text{J}$  incident intensities, respectively.

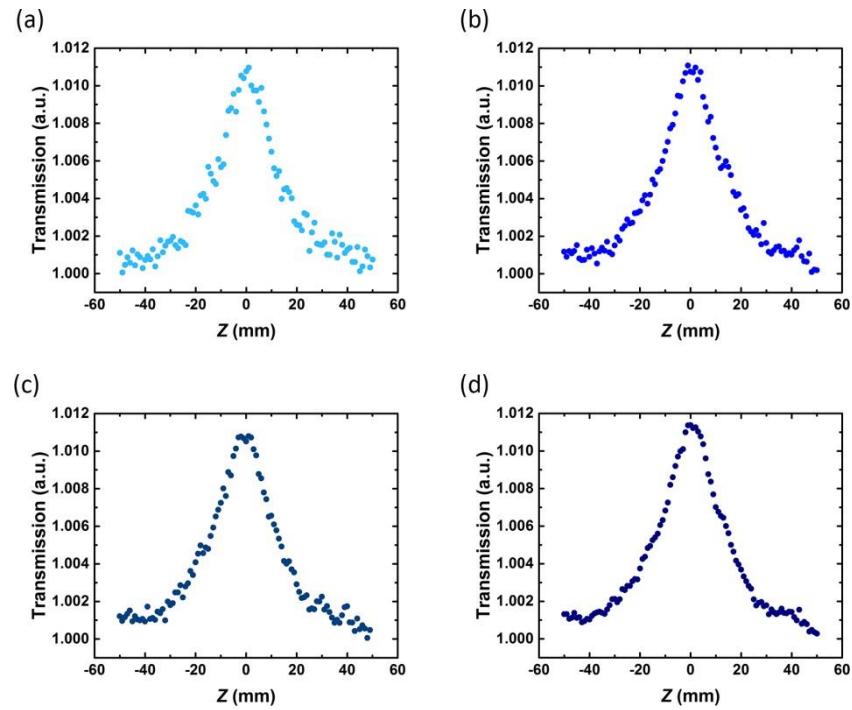

**Figure S4.** Non-linear absorption responses detected by Z-scan system with (a) 50  $\mu\text{J}$ , (b) 80  $\mu\text{J}$ , (c) 100  $\mu\text{J}$ , and (d) 150  $\mu\text{J}$  incident intensities.
